# Supplementary material
Source: MDPI journal article supplement (https://www.mdpi.com/2071-1050/13/16/8929)
Supplement: s1 [file s1]

# Organic field

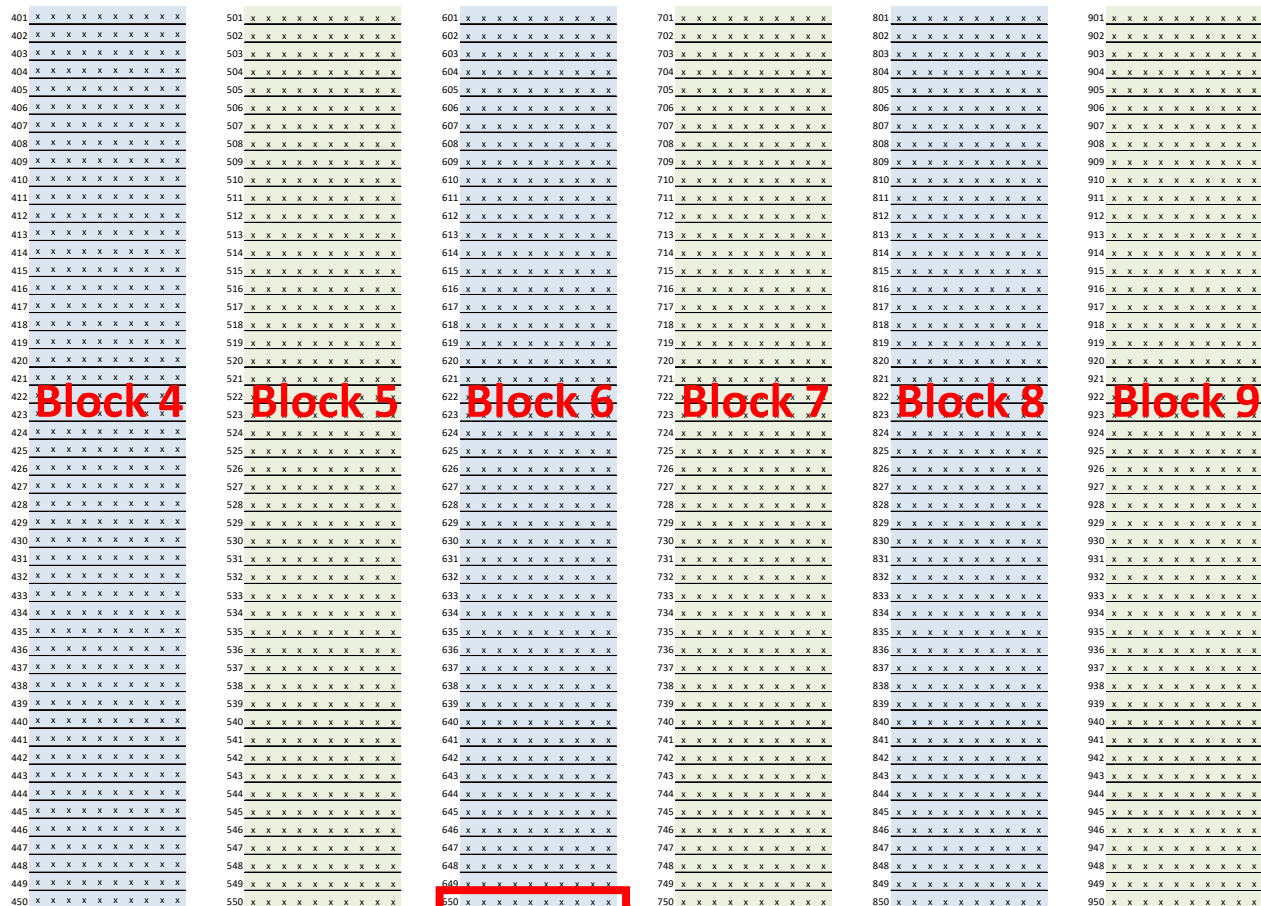

# Conventional field

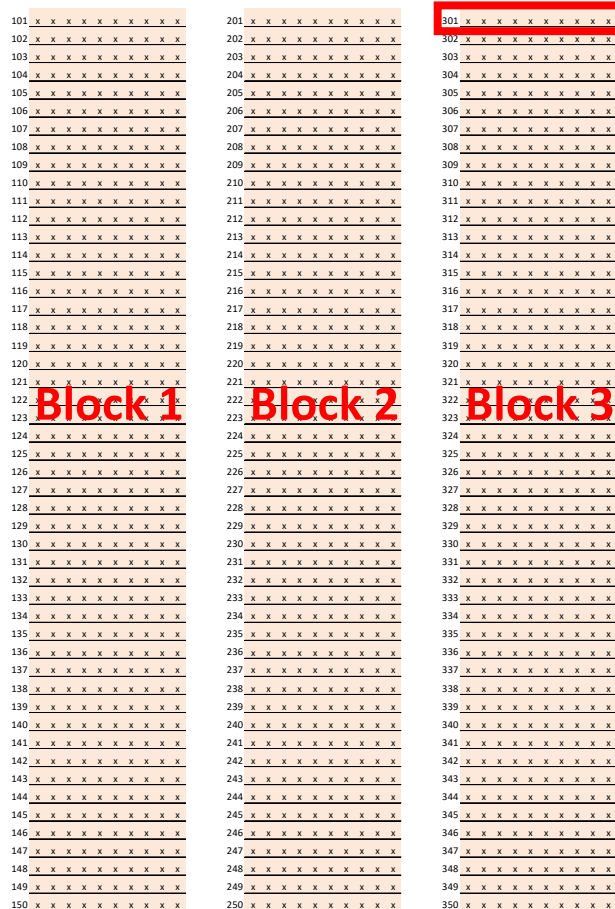

Row with 10 spaced plants

 = LAWN  
 = FORA  
 = CONV

Figure S1. Graphical illustration of the layout of the field experiment.
