# Supplementary material
Source: MDPI journal article supplement (https://www.mdpi.com/2071-1050/13/16/8929)
Supplement: s1 [file s1]

**Table 1.** List of alfalfa (*Medicago sativa* L.) accessions used in the experiment

| Nr | Name                | Type <sup>1</sup> | Source / Breeder  | Origin |
|----|---------------------|-------------------|-------------------|--------|
| 1  | Grimm               | LR                | IPK               | CAN    |
| 2  | HunterRiver         | LR                | IPK               | AUS    |
| 3  | Flamande_2          | LR                | IPK               | FRA    |
| 4  | AltfraenkischeBW    | LR                | IPK               | DEU    |
| 5  | IPK_LE864           | ECO               | IPK               | SUN    |
| 6  | Taschkentskaja_721  | ECO               | IPK               | UZB    |
| 7  | Taschkentskaja_1728 | ECO               | IPK               | UZB    |
| 8  | Taschkentskaja_3192 | ECO               | IPK               | UZB    |
| 9  | CN-39465            | LR                | GRIN              | GBR    |
| 10 | Miechowska          | LR                | GRIN              | POL    |
| 11 | Alta-Sierra         | LR                | GRIN              | CHL    |
| 12 | Criolla             | LR                | GRIN              | BOL    |
| 13 | X910013             | LR                | GRIN              | CHN    |
| 14 | GRIN_262541         | ECO               | GRIN              | BUL    |
| 15 | FC-34511            | NA                | GRIN              | NZL    |
| 16 | No.527              | ECO               | GRIN              | CAN    |
| 17 | VIR-24712           | ECO               | GRIN              | RUS    |
| 18 | No.218              | ECO               | GRIN              | RUS    |
| 19 | No.2838             | ECO               | GRIN              | POL    |
| 20 | No.16272            | ECO               | GRIN              | CHE    |
| 21 | No.16273            | ECO               | GRIN              | CHE    |
| 22 | S-225               | ECO               | GRIN              | RUS    |
| 23 | CIN-1956            | ECO               | GRIN              | GBR    |
| 24 | Bobrava             | CV                | GRIN              | CZE    |
| 25 | Tuna                | CV                | GRIN              | SWE    |
| 26 | Artemis             | CV                | Barenbrug         | NLD    |
| 27 | Sanditi             | CV                | Barenbrug         | NLD    |
| 28 | Alexis              | CV                | Barenbrug         | NLD    |
| 29 | Alpha               | CV                | Barenbrug         | NLD    |
| 30 | Bardine             | CV                | Barenbrug         | NLD    |
| 31 | Rachel              | CV                | Caussade          | FRA    |
| 32 | Excelle             | CV                | Caussade          | FRA    |
| 33 | Eride               | CV                | Continental       | ITA    |
| 34 | Gea                 | CV                | Continental       | ITA    |
| 35 | Robot               | CV                | CRA-FLC           | ITA    |
| 36 | Creno               | CV                | DLF Trifolium     | DNK    |
| 37 | Power_4.2           | CV                | DLF Trifolium     | DNK    |
| 38 | Europe              | CV                | DLF Trifolium     | DNK    |
| 39 | Eugenia             | CV                | D'Eugenio Sementi | ITA    |
| 40 | Blue-Moon           | CV                | Natura s.l.r.     | ITA    |
| 41 | Daphne              | CV                | Florimond Desprez | FRA    |
| 42 | Timbale             | CV                | Gie Grass         | FRA    |
| 43 | Galaxie             | CV                | Jouffray-Drillaud | FRA    |
| 44 | Felicia             | CV                | Jouffray-Drillaud | FRA    |

|    |           |    |                                       |     |
|----|-----------|----|---------------------------------------|-----|
| 45 | Luzelle   | CV | Jouffray-Drillaud                     | FRA |
| 46 | SK-Rasa   | CV | LLU Research Institute of Agriculture | LVA |
| 47 | Cannelle  | CV | R2n                                   | FRA |
| 48 | Fusion    | CV | Schmidt-Gambazza                      | FRA |
| 49 | Fiesta    | CV | Schmidt-Gambazza                      | FRA |
| 50 | Fleetwood | CV | Saatzucht Steinach                    | DEU |

---

<sup>1</sup> LR = landrace, ECO = ecotype, CV = cultivar.
